# Supplementary material
Source: MDPI journal article supplement (https://www.mdpi.com/2313-0105/8/11/231)
Supplement: s1 [file s1]

# Supplementary Information

Deep learning classification of Li-ion battery materials  
targeting accurate composition classification from laser-  
induced breakdown spectroscopy high-speed analyses

**Marie-Chloé Michaud Paradis <sup>1</sup>, François R. Doucet <sup>2,\*</sup>, Steeve Rousselot <sup>1</sup>, Alex  
Hernández-García <sup>3</sup>, Kheireddine Rifai <sup>2</sup>, Ouardia Touag <sup>1</sup>, Lütfü Ç. Özcan <sup>2</sup>, Nawfal  
Azami <sup>4</sup> and Mickaël Dollé <sup>1,\*</sup>**

<sup>1</sup> Laboratory of chemistry and electrochemistry of solids, Department of Chemistry, Université de Montréal, 1375 Ave. Thérèse-Lavoie-Roux, Montréal, QC, Canada, H2V 0B3

<sup>2</sup> ELEMISSION Inc., 3410 Thimens Blvd, Montréal, QC, Canada, H4R 1V6

<sup>3</sup> Mila - Institut Québécois d'Intelligence Artificielle, Université de Montréal, 6666 Saint-Urbain Street, Montréal, QC, Canada, H2S 3H1

<sup>4</sup> Optics Lab, Institut National des Postes et Télécommunications, Avenue Allal Al Fassi, Rabat, Maroc

\* Correspondence:

FD: fdoucet@elemission.ca; Tel.: 1-514-998-3713

MD: mickael.dolle@umontreal.ca; Tel.: 1- 514-343-7054

## Index:

**Figure S1.** LIBS mean spectra of certain the battery materials and chosen transition lines analyzed using the described method between 215 and 940 nm

**Table S1.** Mean and RSD of training, testing and validation sets accuracies, and training and testing times using selected lines as inputs and using the AM algorithm over 10 iterations.

**Table S2.** Mean and RSD of training, testing and validation sets accuracies, and training and testing times using selected lines as inputs and using the SVM algorithm over 10 iterations.

**Table S3.** Mean and RSD of training, testing and validation sets accuracies, and training and testing times using selected lines as inputs and using the RF algorithm over 10 iterations.

**Table S4.** Mean and RSD of training, testing and validation sets accuracies, and training and testing times using selected lines as inputs and using the DNN1 algorithm over 10 iterations.

**Figure S2.** Accuracy and RSD as functions of the size of the training set for different machine learning classification algorithms over 10 iterations using selected transition lines.

**Figure S3.** Confusion matrix using selected lines as inputs and using the AM algorithm with a 0.01 train set size.

**Figure S4.** Confusion matrix using selected lines as inputs and using the SVM algorithm with a 0.01 train set size.

**Figure S5.** Confusion matrix using selected lines as inputs and using the RF algorithm with a 0.01 train set size.

**Figure S6.** Confusion matrix using selected lines as inputs and using the DNN1 algorithm with a 0.01 train set size.

**Table S5.** Mean and RSD of training, testing and validation sets accuracies, and training and testing times using full spectra as inputs and using the AM algorithm over 10 iterations.

**Table S6.** Mean and RSD of training, testing and validation sets accuracies, and training and testing times using full spectra as inputs and using the SVM algorithm over 10 iterations.

**Table S7.** Mean and RSD of training, testing and validation sets accuracies, and training and testing times using full spectra as inputs and using the RF algorithm over 10 iterations

**Table S8.** Mean and RSD of training, testing and validation sets accuracies, and training and testing times using full spectra as inputs and using the DNN1 algorithm over 10 iterations.

**Table S9.** Mean and RSD of training, testing and validation sets accuracies, and training and testing times using full spectra as inputs and using the DNN2 algorithm over 10 iterations.

**Table S10.** Mean and RSD of training, testing and validation sets accuracies, and training and testing times using full spectra as inputs and using the DNN3 algorithm over 10 iterations.

**Table S11.** Mean and RSD of training, testing and validation sets accuracies, and training and testing times using full spectra as inputs and using the CNN1 algorithm over 10 iterations.

**Figure S7.** Confusion matrix using full spectra as inputs and using the AM algorithm with a 0.01 train set size.

**Figure S8.** Confusion matrix using full spectra as inputs and using the SVM algorithm with a 0.01 train set size.

**Figure S9.** Confusion matrix using full spectra as inputs and using the RF algorithm with a 0.01 train set size.

**Figure S10.** Confusion matrix using full spectra as inputs and using the DNN1 algorithm with a 0.01 train set size.

**Figure S11.** Confusion matrix using full spectra as inputs and using the DNN2 algorithm with a 0.01 train set size.

**Figure S12.** Confusion matrix using full spectra as inputs and using the DNN3 algorithm with a 0.01 train set size.

**Figure S13.** Confusion matrix using full spectra as inputs and using the CNN1 algorithm with a 0.01 train set size.

**Figure S14.** Training and testing times and RSD as functions of the size of the training set for different machine learning classification algorithms over 10 iterations using full spectra.

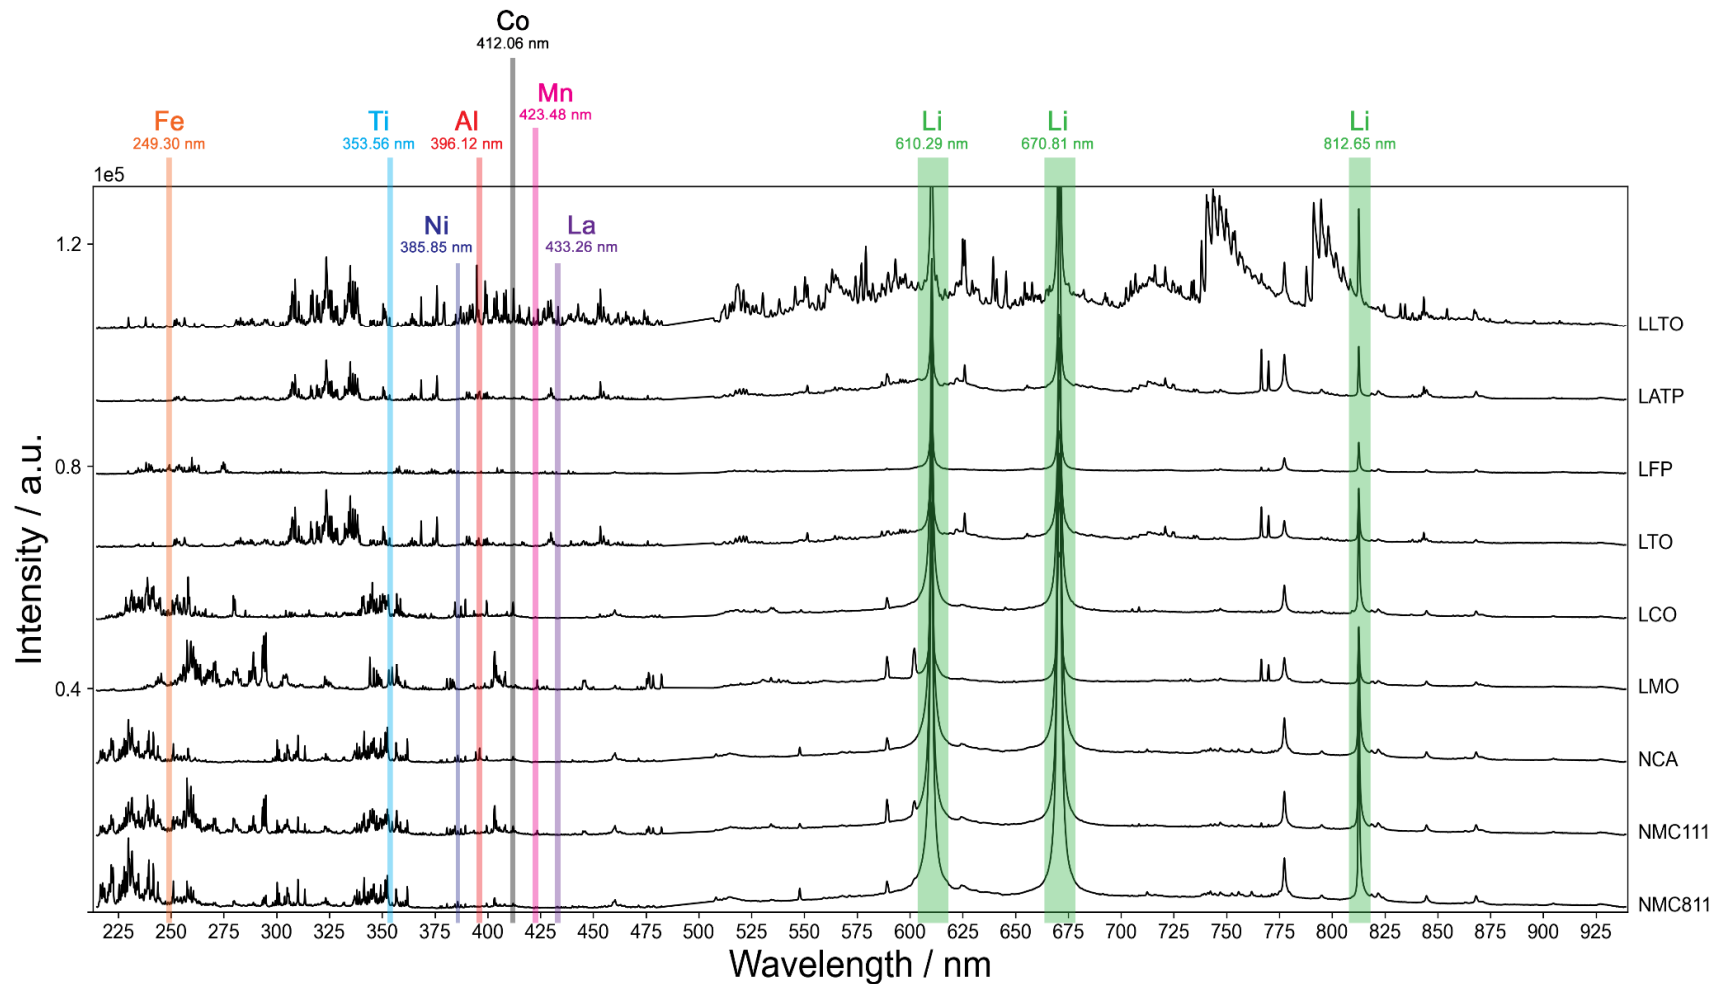

**Figure S1.** LIBS mean spectra of certain the battery materials and chosen transition lines analyzed using the described method between 215 and 940 nm.

**Table S1.** Mean and RSD of training, testing and validation sets accuracies, and training and testing times using selected lines as inputs and using the AM algorithm over 10 iterations.

| Train set size | Value | Training set accuracy / % | Testing set accuracy / % | Validation set accuracy / % | Training time / s | Testing time / s |
|----------------|-------|---------------------------|--------------------------|-----------------------------|-------------------|------------------|
| <b>0.01</b>    | Mean  | 9.09                      | 9.09                     | 9.09                        | 2.0E-04           | 1.5E-01          |
|                | RSD   | <0.01                     | <0.01                    | <0.01                       | 2.1E+00           | 7.4E-02          |
| <b>0.02</b>    | Mean  | 9.09                      | 9.10                     | 9.10                        | 3.0E-04           | 1.5E-01          |
|                | RSD   | <0.01                     | <0.01                    | <0.01                       | 1.6E+00           | 6.1E-02          |
| <b>0.05</b>    | Mean  | 9.16                      | 9.09                     | 9.09                        | 2.0E-04           | 1.5E-01          |
|                | RSD   | 0.02                      | <0.01                    | <0.01                       | 2.1E+00           | 8.3E-02          |
| <b>0.1</b>     | Mean  | 9.09                      | 9.09                     | 9.09                        | 2.9E-04           | 1.5E-01          |
|                | RSD   | <0.01                     | <0.01                    | <0.01                       | 1.6E+00           | 6.0E-02          |
| <b>0.2</b>     | Mean  | 9.09                      | 9.09                     | 9.09                        | 3.0E-04           | 1.6E-01          |
|                | RSD   | <0.01                     | <0.01                    | <0.01                       | 1.6E+00           | 5.9E-02          |
| <b>0.5</b>     | Mean  | 9.09                      | 9.09                     | 9.09                        | 4.0E-04           | 1.6E-01          |
|                | RSD   | <0.01                     | <0.01                    | <0.01                       | 1.3E+00           | 4.2E-02          |

**Table S2.** Mean and RSD of training, testing and validation sets accuracies, and training and testing times using selected lines as inputs and using the SVM algorithm over 10 iterations.

| Train set size | Value | Training set accuracy / % | Testing set accuracy / % | Validation set accuracy / % | Training time / s | Testing time / s |
|----------------|-------|---------------------------|--------------------------|-----------------------------|-------------------|------------------|
| <b>0.01</b>    | Mean  | 75.82                     | 66.57                    | 66.87                       | 2.9E-03           | 7.2E-02          |
|                | RSD   | 0.06                      | 0.10                     | 0.11                        | 3.0E-01           | 4.9E-02          |
| <b>0.02</b>    | Mean  | 68.55                     | 64.94                    | 64.73                       | 3.6E-03           | 9.4E-02          |
|                | RSD   | 0.08                      | 0.07                     | 0.07                        | 3.0E-01           | 5.4E-02          |
| <b>0.05</b>    | Mean  | 61.75                     | 61.13                    | 61.25                       | 7.3E-03           | 1.7E-01          |
|                | RSD   | 0.09                      | 0.08                     | 0.08                        | 2.7E-01           | 7.2E-02          |
| <b>0.1</b>     | Mean  | 60.09                     | 58.14                    | 58.14                       | 1.3E-02           | 2.9E-01          |
|                | RSD   | 0.08                      | 0.11                     | 0.11                        | 2.1E-01           | 7.1E-02          |
| <b>0.2</b>     | Mean  | 59.69                     | 58.72                    | 58.65                       | 3.8E-02           | 5.1E-01          |
|                | RSD   | 0.03                      | 0.06                     | 0.06                        | 1.3E-01           | 4.7E-02          |
| <b>0.5</b>     | Mean  | 59.45                     | 59.07                    | 58.44                       | 1.7E-01           | 1.1E+00          |
|                | RSD   | 0.04                      | 0.05                     | 0.05                        | 9.1E-02           | 2.6E-02          |

**Table S3.** Mean and RSD of training, testing and validation sets accuracies, and training and testing times using selected lines as inputs and using the RF algorithm over 10 iterations.

| Train set size | Value | Training set accuracy / % | Testing set accuracy / % | Validation set accuracy / % | Training time / s | Testing time / s |
|----------------|-------|---------------------------|--------------------------|-----------------------------|-------------------|------------------|
| <b>0.01</b>    | Mean  | 100.00                    | 87.94                    | 87.77                       | 1.2E-01           | 8.1E-01          |
|                | RSD   | <0.01                     | 0.02                     | 0.02                        | 4.5E-02           | 2.8E-02          |
| <b>0.02</b>    | Mean  | 100.00                    | 92.19                    | 92.26                       | 1.3E-01           | 8.1E-01          |
|                | RSD   | <0.01                     | 0.01                     | 0.01                        | 3.2E-02           | 1.4E-02          |
| <b>0.05</b>    | Mean  | 100.00                    | 94.66                    | 94.57                       | 1.5E-01           | 8.3E-01          |
|                | RSD   | <0.01                     | 0.01                     | 0.01                        | 2.9E-02           | 3.8E-02          |
| <b>0.1</b>     | Mean  | 100.00                    | 95.47                    | 95.54                       | 1.8E-01           | 8.2E-01          |
|                | RSD   | <0.01                     | <0.01                    | <0.01                       | 3.7E-02           | 1.4E-02          |
| <b>0.2</b>     | Mean  | 100.00                    | 96.43                    | 96.26                       | 2.6E-01           | 8.4E-01          |
|                | RSD   | <0.01                     | <0.01                    | <0.01                       | 3.1E-02           | 3.0E-02          |
| <b>0.5</b>     | Mean  | 100.00                    | 96.65                    | 96.81                       | 5.1E-01           | 9.0E-01          |
|                | RSD   | <0.01                     | <0.01                    | <0.01                       | 2.1E-02           | 2.9E-02          |

**Table S4.** Mean and RSD of training, testing and validation sets accuracies, and training and testing times using selected lines as inputs and using the DNN1 algorithm over 10 iterations.

| Train set size | Value | Training set accuracy / % | Testing set accuracy / % | Validation set accuracy / % | Training time / s | Testing time / s |
|----------------|-------|---------------------------|--------------------------|-----------------------------|-------------------|------------------|
| <b>0.01</b>    | Mean  | 97.09                     | 94.76                    | 94.96                       | 1.1E+02           | 3.4E-01          |
|                | RSD   | 0.02                      | 0.01                     | <0.01                       | 2.5E-02           | 1.6E-01          |
| <b>0.02</b>    | Mean  | 96.64                     | 95.05                    | 95.05                       | 8.4E+01           | 3.2E-01          |
|                | RSD   | 0.02                      | 0.01                     | <0.01                       | 2.0E-01           | 3.5E-02          |
| <b>0.05</b>    | Mean  | 96.07                     | 95.68                    | 95.46                       | 7.3E+01           | 3.3E-01          |
|                | RSD   | 0.01                      | <0.01                    | <0.01                       | 1.5E-01           | 2.7E-02          |
| <b>0.1</b>     | Mean  | 96.02                     | 95.58                    | 95.55                       | 5.9E+01           | 3.4E-01          |
|                | RSD   | 0.01                      | <0.01                    | <0.01                       | 3.3E-01           | 3.3E-02          |
| <b>0.2</b>     | Mean  | 96.38                     | 95.91                    | 95.81                       | 5.5E+01           | 3.3E-01          |
|                | RSD   | 0.01                      | <0.01                    | <0.01                       | 3.3E-01           | 7.2E-02          |

|     |      |       |       |       |         |         |
|-----|------|-------|-------|-------|---------|---------|
| 0.5 | Mean | 96.16 | 95.97 | 96.03 | 4.9E+01 | 3.3E-01 |
|     | RSD  | 0.01  | <0.01 | <0.01 | 4.3E-01 | 1.8E-02 |

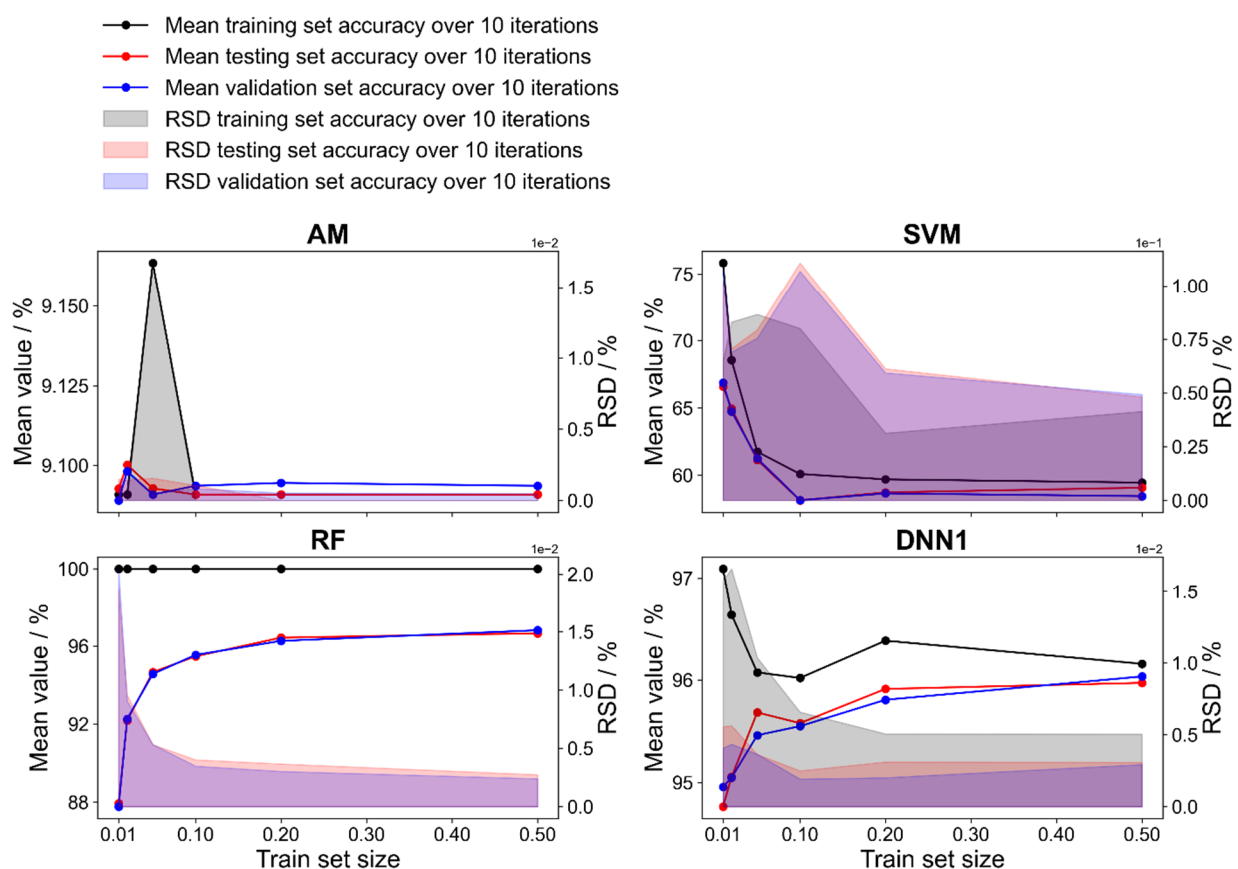

**Figure S2.** Accuracy and RSD as functions of the size of the training set for different machine learning classification algorithms over 10 iterations using selected transition lines.

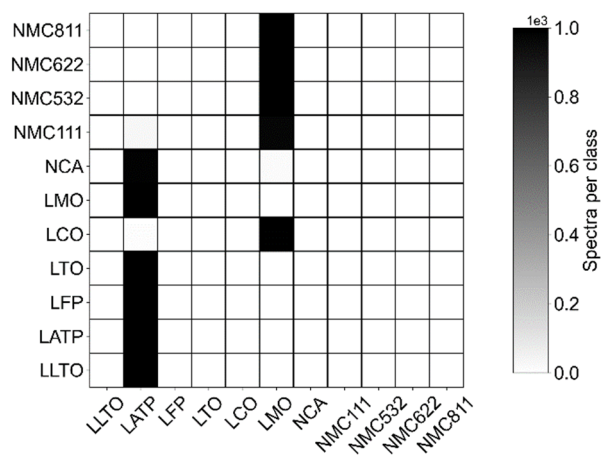

**Figure S3.** Confusion matrix using selected lines as inputs and using the AM algorithm with a 0.01 train set size.

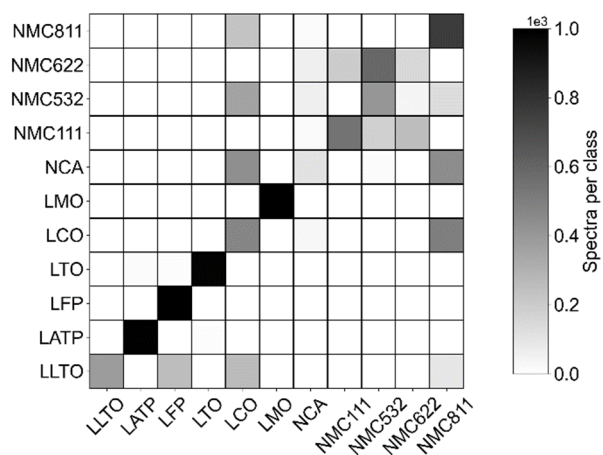

**Figure S4.** Confusion matrix using selected lines as inputs and using the SVM algorithm with a 0.01 train set size.



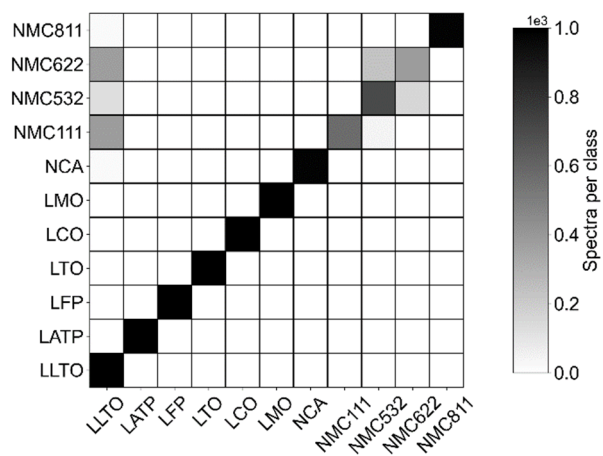

**Figure S5.** Confusion matrix using selected lines as inputs and using the RF algorithm with a 0.01 train set size.

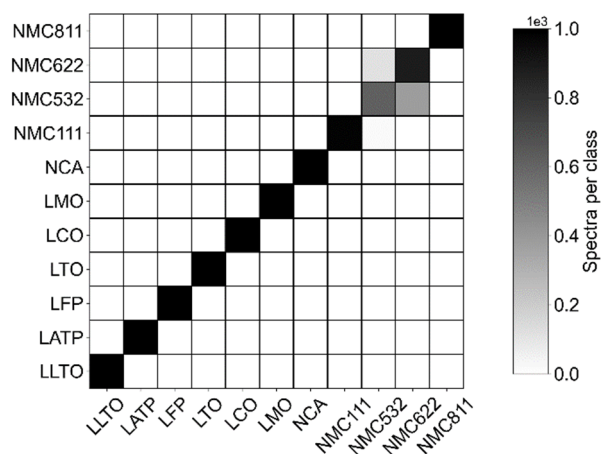

**Figure S6.** Confusion matrix using selected lines as inputs and using the DNN1 algorithm with a 0.01 train set size.

**Table S5.** Mean and RSD of training, testing and validation sets accuracies, and training and testing times using full spectra as inputs and using the AM algorithm over 10 iterations.

| Train set size | Value | Training set accuracy / % | Testing set accuracy / % | Validation set accuracy / % | Training time / s | Testing time / s |
|----------------|-------|---------------------------|--------------------------|-----------------------------|-------------------|------------------|
| <b>0.01</b>    | Mean  | 85.64                     | 82.45                    | 82.38                       | 1.0E-03           | 1.8E-01          |
|                | RSD   | 0.03                      | 0.02                     | 0.02                        | 4.2E-01           | 2.1E-01          |
| <b>0.02</b>    | Mean  | 85.45                     | 82.16                    | 82.07                       | 1.2E-03           | 1.7E-01          |
|                | RSD   | 0.04                      | 0.03                     | 0.03                        | 4.4E-01           | 1.9E-01          |
| <b>0.05</b>    | Mean  | 86.62                     | 84.73                    | 84.88                       | 3.0E-03           | 2.0E-01          |
|                | RSD   | 0.01                      | <0.01                    | 0.01                        | 3.9E-01           | 1.9E-01          |
| <b>0.1</b>     | Mean  | 85.16                     | 84.72                    | 84.58                       | 4.2E-03           | 1.7E-01          |
|                | RSD   | 0.01                      | 0.01                     | 0.01                        | 2.9E-01           | 1.9E-01          |
| <b>0.2</b>     | Mean  | 85.41                     | 84.56                    | 84.68                       | 8.9E-03           | 1.9E-01          |
|                | RSD   | 0.01                      | 0.01                     | 0.01                        | 2.8E-01           | 2.1E-01          |
| <b>0.5</b>     | Mean  | 84.91                     | 84.71                    | 84.88                       | 1.8E-02           | 1.8E-01          |
|                | RSD   | 0.01                      | 0.01                     | <0.01                       | 2.9E-01           | 1.8E-01          |

**Table S6.** Mean and RSD of training, testing and validation sets accuracies, and training and testing times using full spectra as inputs and using the SVM algorithm over 10 iterations.

| Train set size | Value | Training set accuracy / % | Testing set accuracy / % | Validation set accuracy / % | Training time / s | Testing time / s |
|----------------|-------|---------------------------|--------------------------|-----------------------------|-------------------|------------------|
| <b>0.01</b>    | Mean  | 80.55                     | 74.89                    | 75.04                       | 1.5E-02           | 2.2E+00          |
|                | RSD   | 0.06                      | 0.05                     | 0.05                        | 1.1E+00           | 3.6E-02          |
| <b>0.02</b>    | Mean  | 78.45                     | 75.65                    | 75.44                       | 2.0E-02           | 2.9E+00          |
|                | RSD   | 0.04                      | 0.04                     | 0.04                        | 9.5E-01           | 9.6E-02          |
| <b>0.05</b>    | Mean  | 79.85                     | 78.64                    | 78.86                       | 3.3E-02           | 3.8E+00          |
|                | RSD   | 0.04                      | 0.02                     | 0.02                        | 6.0E-02           | 2.5E-02          |
| <b>0.1</b>     | Mean  | 81.05                     | 80.89                    | 80.74                       | 7.3E-02           | 4.2E+00          |
|                | RSD   | 0.02                      | 0.02                     | 0.01                        | 3.6E-01           | 1.2E-02          |
| <b>0.2</b>     | Mean  | 83.04                     | 82.56                    | 82.70                       | 1.6E-01           | 4.8E+00          |
|                | RSD   | 0.01                      | 0.02                     | 0.01                        | 1.2E-01           | 7.7E-03          |
| <b>0.5</b>     | Mean  | 84.75                     | 84.49                    | 84.63                       | 6.4E-01           | 6.6E+00          |
|                | RSD   | <0.01                     | 0.01                     | <0.01                       | 2.8E-02           | 7.0E-03          |

**Table S7.** Mean and RSD of training, testing and validation sets accuracies, and training and testing times using full spectra as inputs and using the RF algorithm over 10 iterations.

| Train set size | Value | Training set accuracy / % | Testing set accuracy / % | Validation set accuracy / % | Training time / s | Testing time / s |
|----------------|-------|---------------------------|--------------------------|-----------------------------|-------------------|------------------|
| <b>0.01</b>    | Mean  | 100.00                    | 78.95                    | 78.97                       | 2.5E-01           | 1.2E+00          |
|                | RSD   | <0.01                     | 0.04                     | 0.04                        | 6.8E-02           | 2.3E-02          |
| <b>0.02</b>    | Mean  | 100.00                    | 88.93                    | 88.73                       | 4.0E-01           | 1.2E+00          |
|                | RSD   | <0.01                     | 0.01                     | 0.01                        | 4.3E-02           | 1.4E-02          |
| <b>0.05</b>    | Mean  | 100.00                    | 94.47                    | 94.27                       | 9.1E-01           | 1.2E+00          |
|                | RSD   | <0.01                     | 0.01                     | 0.01                        | 1.3E-02           | 2.5E-02          |
| <b>0.1</b>     | Mean  | 100.00                    | 96.49                    | 96.44                       | 1.8E+00           | 1.2E+00          |
|                | RSD   | <0.01                     | 0.01                     | 0.01                        | 1.0E-02           | 2.6E-02          |
| <b>0.2</b>     | Mean  | 100.00                    | 97.91                    | 97.99                       | 3.8E+00           | 1.3E+00          |
|                | RSD   | <0.01                     | 0.01                     | 0.01                        | 1.5E-02           | 1.5E-02          |
| <b>0.5</b>     | Mean  | 100.00                    | 99.16                    | 99.14                       | 1.0E+01           | 1.3E+00          |
|                | RSD   | <0.01                     | <0.01                    | <0.01                       | 9.1E-03           | 3.5E-02          |

**Table S8.** Mean and RSD of training, testing and validation sets accuracies, and training and testing times using full spectra as inputs and using the DNN1 algorithm over 10 iterations.

| Train set size | Value | Training set accuracy / % | Testing set accuracy / % | Validation set accuracy / % | Training time / s | Testing time / s |
|----------------|-------|---------------------------|--------------------------|-----------------------------|-------------------|------------------|
| <b>0.01</b>    | Mean  | 100.00                    | 93.02                    | 93.03                       | 9.6E+01           | 1.1E+00          |
|                | RSD   | <0.01                     | 0.02                     | 0.02                        | 8.4E-02           | 6.2E-02          |
| <b>0.02</b>    | Mean  | 99.91                     | 96.17                    | 96.13                       | 6.4E+01           | 1.2E+00          |
|                | RSD   | <0.01                     | 0.01                     | 0.01                        | 1.6E-01           | 1.2E-01          |
| <b>0.05</b>    | Mean  | 99.75                     | 97.97                    | 97.95                       | 7.0E+01           | 1.3E+00          |
|                | RSD   | <0.01                     | 0.01                     | 0.01                        | 4.4E-01           | 8.5E-02          |
| <b>0.1</b>     | Mean  | 99.42                     | 98.22                    | 98.16                       | 5.0E+01           | 1.4E+00          |
|                | RSD   | <0.01                     | 0.01                     | 0.01                        | 4.4E-01           | 3.1E-02          |
| <b>0.2</b>     | Mean  | 99.95                     | 99.55                    | 99.59                       | 6.4E+01           | 1.4E+00          |
|                | RSD   | <0.01                     | <0.01                    | <0.01                       | 3.1E-01           | 3.3E-02          |
| <b>0.5</b>     | Mean  | 100.00                    | 99.97                    | 99.94                       | 6.2E+01           | 1.6E+00          |

|     |       |       |       |         |         |
|-----|-------|-------|-------|---------|---------|
| RSD | <0.01 | <0.01 | <0.01 | 2.5E-01 | 2.4E-01 |
|-----|-------|-------|-------|---------|---------|

**Table S9.** Mean and RSD of training, testing and validation sets accuracies, and training and testing times using full spectra as inputs and using the DNN2 algorithm over 10 iterations.

| Train set size | Value | Training set accuracy / % | Testing set accuracy / % | Validation set accuracy / % | Training time / s | Testing time / s |
|----------------|-------|---------------------------|--------------------------|-----------------------------|-------------------|------------------|
| 0.01           | Mean  | 100.00                    | 93.03                    | 93.12                       | 9.2E+01           | 1.1E+00          |
|                | RSD   | <0.01                     | 0.02                     | 0.02                        | 8.7E-02           | 4.6E-02          |
| 0.02           | Mean  | 99.73                     | 96.24                    | 96.17                       | 6.5E+01           | 1.2E+00          |
|                | RSD   | <0.01                     | 0.01                     | 0.01                        | 1.2E-01           | 3.6E-02          |
| 0.05           | Mean  | 99.05                     | 97.44                    | 97.42                       | 5.5E+01           | 1.3E+00          |
|                | RSD   | 0.01                      | 0.01                     | 0.01                        | 4.2E-01           | 9.2E-02          |
| 0.1            | Mean  | 99.18                     | 98.01                    | 97.93                       | 5.0E+01           | 1.4E+00          |
|                | RSD   | 0.01                      | 0.01                     | 0.01                        | 3.5E-01           | 6.7E-02          |
| 0.2            | Mean  | 99.95                     | 99.60                    | 99.63                       | 7.5E+01           | 1.5E+00          |
|                | RSD   | <0.01                     | <0.01                    | <0.01                       | 3.3E-01           | 2.9E-02          |
| 0.5            | Mean  | 99.99                     | 99.95                    | 99.93                       | 5.5E+01           | 1.5E+00          |
|                | RSD   | <0.01                     | <0.01                    | <0.01                       | 2.3E-01           | 4.4E-02          |

**Table S10.** Mean and RSD of training, testing and validation sets accuracies, and training and testing times using full spectra as inputs and using the DNN3 algorithm over 10 iterations.

| Train set size | Value | Training set accuracy / % | Testing set accuracy / % | Validation set accuracy / % | Training time / s | Testing time / s |
|----------------|-------|---------------------------|--------------------------|-----------------------------|-------------------|------------------|
| 0.01           | Mean  | 97.09                     | 90.48                    | 90.49                       | 8.5E+01           | 1.2E+00          |
|                | RSD   | 0.07                      | 0.06                     | 0.06                        | 1.9E-01           | 1.2E-01          |
| 0.02           | Mean  | 99.73                     | 96.12                    | 96.06                       | 6.1E+01           | 1.2E+00          |
|                | RSD   | <0.01                     | 0.01                     | 0.01                        | 1.2E-01           | 4.7E-02          |
| 0.05           | Mean  | 98.95                     | 97.48                    | 97.41                       | 5.4E+01           | 1.3E+00          |
|                | RSD   | 0.01                      | 0.01                     | 0.01                        | 4.4E-01           | 7.3E-02          |
| 0.1            | Mean  | 98.00                     | 97.23                    | 97.03                       | 4.5E+01           | 1.4E+00          |
|                | RSD   | 0.01                      | 0.01                     | 0.01                        | 3.8E-01           | 4.5E-02          |
| 0.2            | Mean  | 99.90                     | 99.50                    | 99.50                       | 7.0E+01           | 1.5E+00          |

|            |      |        |       |       |         |         |
|------------|------|--------|-------|-------|---------|---------|
|            | RSD  | <0.01  | 0.01  | 0.01  | 2.9E-01 | 1.2E-01 |
| <b>0.5</b> | Mean | 100.00 | 99.92 | 99.92 | 5.5E+01 | 1.5E+00 |
|            | RSD  | <0.01  | <0.01 | <0.01 | 1.7E-01 | 2.8E-02 |

**Table S11.** Mean and RSD of training, testing and validation sets accuracies, and training and testing times using full spectra as inputs and using the CNN1 algorithm over 10 iterations.

| <b>Train set size</b> | <b>Value</b> | <b>Training set accuracy / %</b> | <b>Testing set accuracy / %</b> | <b>Validation set accuracy / %</b> | <b>Training time / s</b> | <b>Testing time / s</b> |
|-----------------------|--------------|----------------------------------|---------------------------------|------------------------------------|--------------------------|-------------------------|
| <b>0.01</b>           | Mean         | 82.55                            | 77.62                           | 77.68                              | 1.1E+02                  | 1.4E+00                 |
|                       | RSD          | 0.44                             | 0.44                            | 0.44                               | 4.7E-01                  | 5.5E-02                 |
| <b>0.02</b>           | Mean         | 82.00                            | 80.00                           | 79.94                              | 8.1E+01                  | 1.5E+00                 |
|                       | RSD          | 0.44                             | 0.44                            | 0.44                               | 5.3E-01                  | 9.2E-02                 |
| <b>0.05</b>           | Mean         | 99.31                            | 98.07                           | 98.18                              | 9.4E+01                  | 1.6E+00                 |
|                       | RSD          | 0.01                             | 0.01                            | 0.01                               | 6.3E-01                  | 5.1E-02                 |
| <b>0.1</b>            | Mean         | 99.24                            | 98.90                           | 98.88                              | 1.1E+02                  | 1.7E+00                 |
|                       | RSD          | 0.01                             | 0.01                            | 0.01                               | 5.8E-01                  | 3.6E-02                 |
| <b>0.2</b>            | Mean         | 100.00                           | 99.93                           | 99.94                              | 1.2E+02                  | 1.7E+00                 |
|                       | RSD          | <0.01                            | <0.01                           | <0.01                              | 2.4E-01                  | 2.1E-02                 |
| <b>0.5</b>            | Mean         | 100.00                           | 100.00                          | 99.99                              | 7.2E+01                  | 1.8E+00                 |
|                       | RSD          | <0.01                            | <0.01                           | <0.01                              | 2.3E-01                  | 1.0E-01                 |

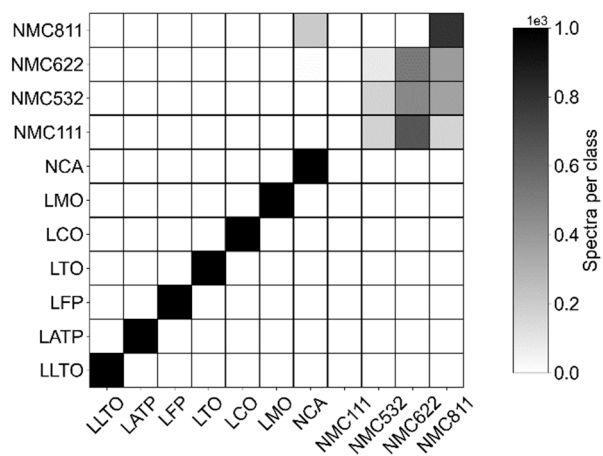

**Figure S7.** Confusion matrix using full spectra as inputs and using the AM algorithm with a 0.01 train set size.

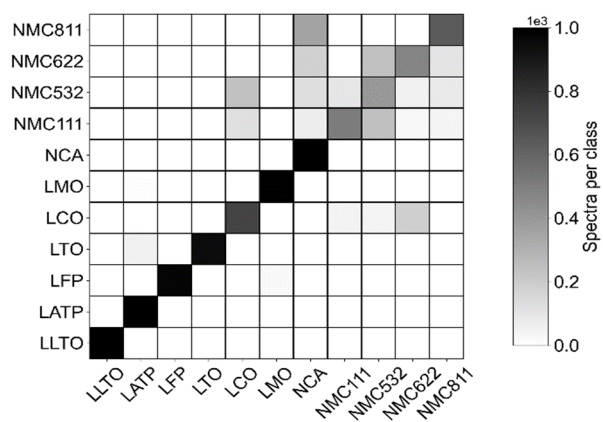

**Figure S8.** Confusion matrix using full spectra as inputs and using the SVM algorithm with a 0.01 train set size.

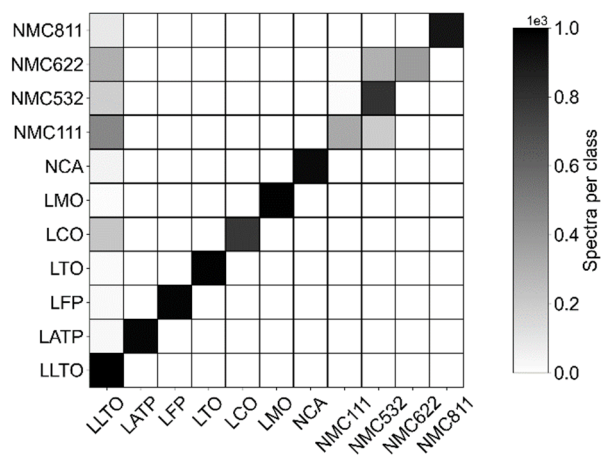

**Figure S9.** Confusion matrix using full spectra as inputs and using the RF algorithm with a 0.01 train set size.

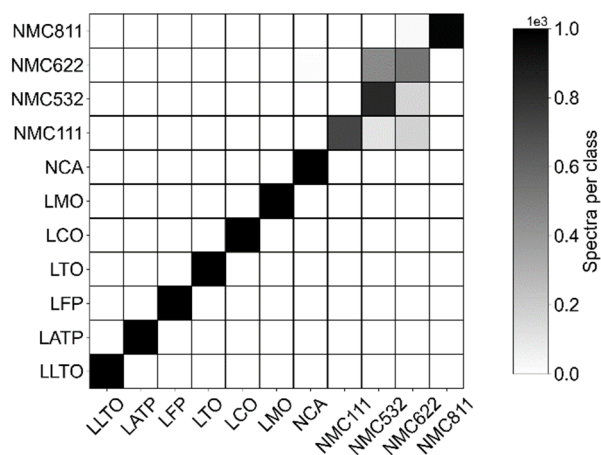

**Figure S10.** Confusion matrix using full spectra as inputs and using the DNN1 algorithm with a 0.01 train set size.

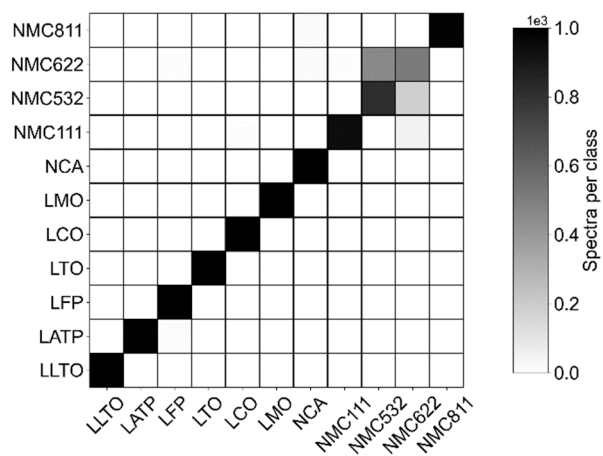

**Figure S11.** Confusion matrix using full spectra as inputs and using the DNN2 algorithm with a 0.01 train set size.

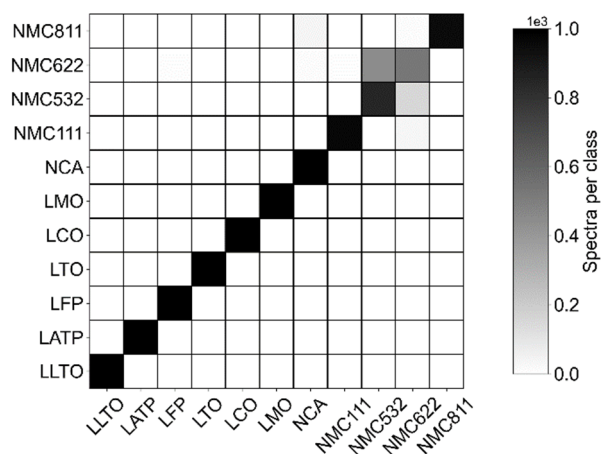

**Figure S12.** Confusion matrix using full spectra as inputs and using the DNN3 algorithm with a 0.01 train set size.



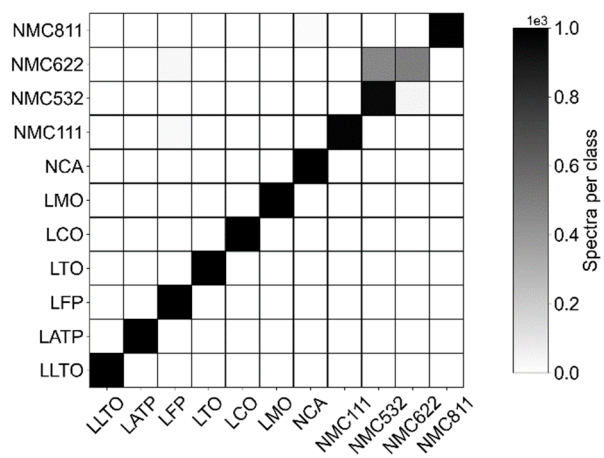

**Figure S13.** Confusion matrix using full spectra as inputs and using the CNN1 algorithm with a 0.01 train set size.

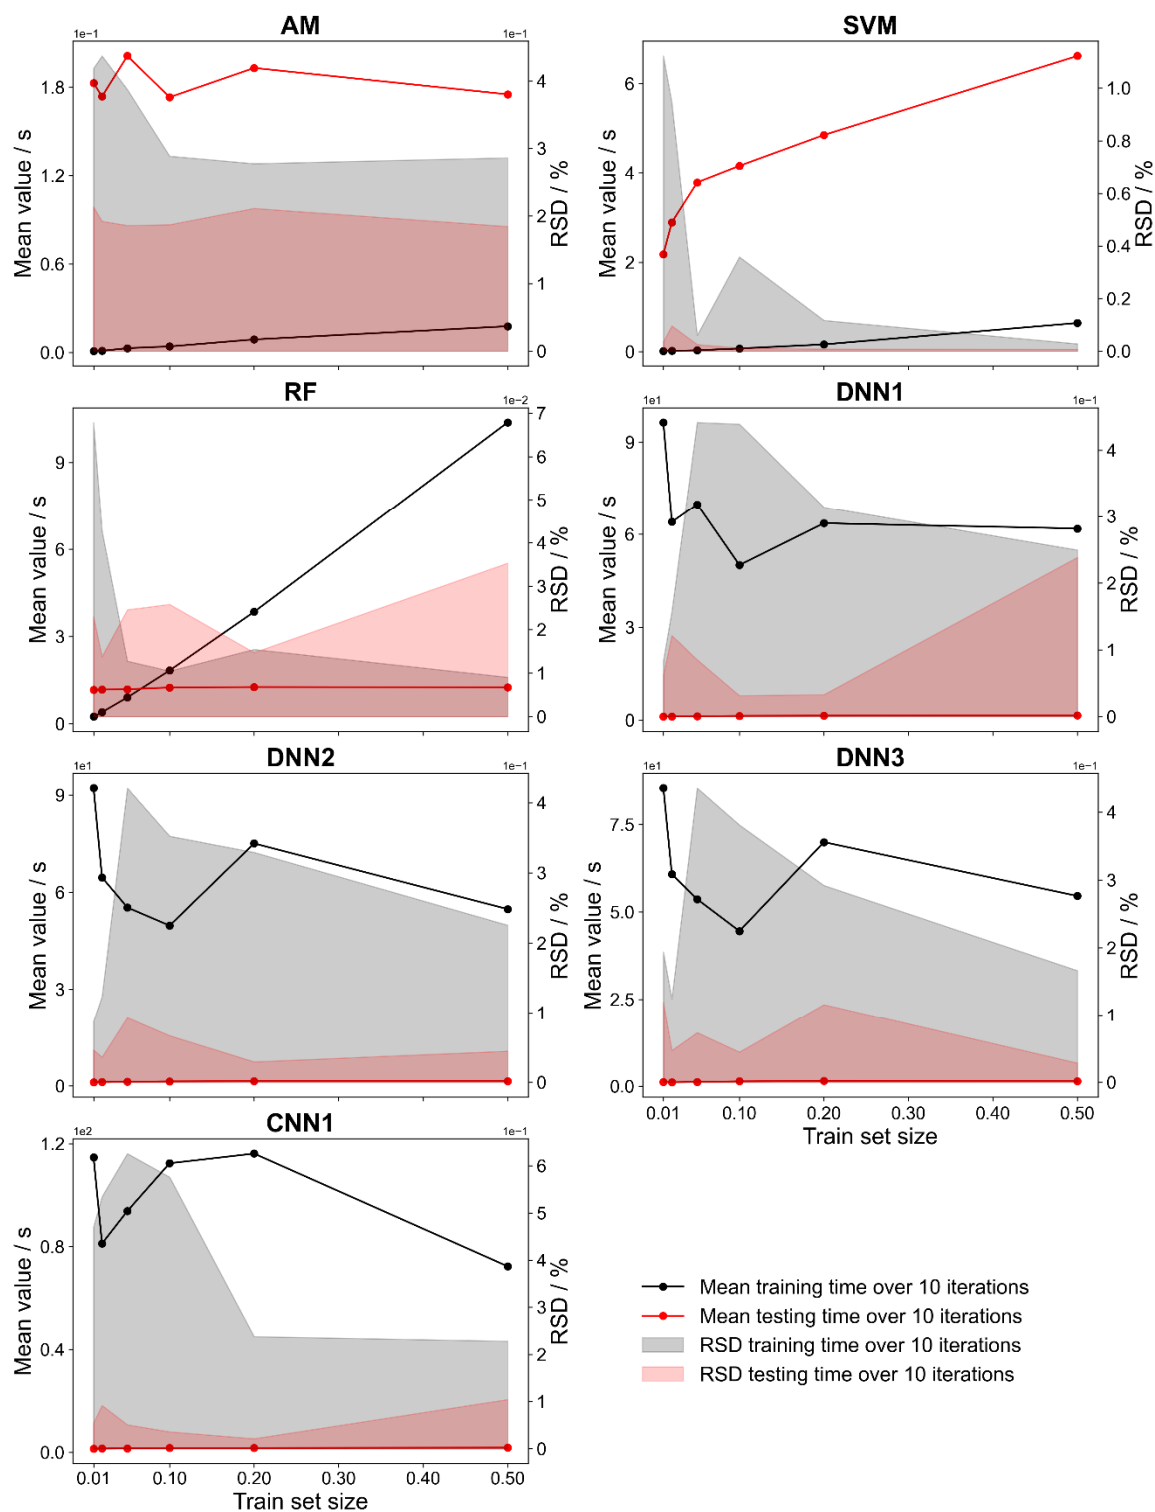

**Figure S14.** Training and testing times and RSD as functions of the size of the training set for different machine learning classification algorithms over 10 iterations using full spectra.
